# Supplementary material
Source: Elsevier journal article supplement (https://www.sciencedirect.com/science/article/pii/S1413355519304940)
Supplement: mmc1 [file S1413355519304940:mmc1.docx]

**Appendix 1 - Supplementary material.** Final translated version to Brazilian-Portuguese of the Functional Gait Assessment.

**Exigências:** Uma pista marcada com 6 metros de comprimento por 30 cm de largura, um cronômetro, duas caixas de sapato de 11 cm de altura cada uma, e uma escada com corrimão.

**1. Andar em uma superfície plana**

**Instruções:** Andar em velocidade normal, daqui até a próxima marca (6 m).

**Pontuação:** Marcar a maior categoria que alcançar.

( ) Normal (3 pontos) - Andar 6 m em menos de 5,5 segundos, sem utilizar recursos auxiliares, com boa velocidade, sem evidências de desequilíbrio, padrão de marcha normal, desvios menores que 15 cm para fora da largura da pista de 30 cm.

( ) Deficiência leve (2 pontos) - Andar 6 m em menos de 7 segundos, mas mais que 5,5 segundos, usa dispositivo de auxílio, baixa velocidade, desvios médios na marcha ou desvios de 15 – 25 cm para fora da largura da pista de 30 cm.

( ) Deficiência moderada (1 ponto) - Andar 6 m, baixa velocidade, padrão anormal de marcha, com evidência de desequilíbrio ou desvios entre 25 – 38 cm para fora da largura da pista de 30 cm. Requer mais que 7 segundos para deambular os 6 m.

( ) Deficiência grave (0 ponto) - Não consegue andar os 6 m sem assistência, desvios ou desequilíbrios graves na marcha, maiores que 38 cm para fora da largura da pista de 30 cm, ou toca a parede.

**2. Mudança na velocidade da marcha**

**Instruções:** Comece a andar no seu ritmo normal (por 1,5 m). Quando eu falar “vai”, ande o mais rápido que você puder (por 1,5 m). Quando eu falar “devagar”, ande o mais devagar que você puder (por 1,5 m).

**Pontuação:** Marcar a maior categoria que alcançar.

( ) Normal (3 pontos) - Capaz de mudar suavemente a velocidade da marcha sem perda de equilíbrio ou desvio da marcha. Mostra uma diferença significativa na velocidade da marcha entre velocidades normal, rápida e devagar. Não desvia mais que 15 cm para fora da largura da pista de 30 cm.

( ) Deficiência leve (2 pontos) - Capaz de mudar a velocidade, mas demonstra pequenos desvios na marcha, de 15 – 25 cm para fora da largura da pista de 30 cm, ou nenhum desvio na marcha, mas é incapaz de alcançar uma mudança significativa na velocidade, ou usa um dispositivo de auxílio.

( ) Deficiência moderada (1 ponto) - Faz apenas pequenos ajustes na velocidade da marcha, ou realiza uma mudança na velocidade com desvio significativo de 25 – 38 cm para fora da largura da pista de 30 cm, ou muda a velocidade, perde equilíbrio, mas é capaz de recuperar e continuar a andar.

( ) Deficiência grave (0 ponto) - Não pode mudar a velocidade, desvia mais que 38 cm para fora da largura da pista de 30 cm ou perde equilíbrio e precisa tocar a parede ou ser pego.

**3. Marcha com rotação horizontal da cabeça**

**Instruções:** Comece a andar no seu ritmo normal. Continue andando em linha reta, após 3 passos, vire a cabeça para a direita e continue andando em linha reta enquanto olha para a direita. Após mais 3 passos, rode a cabeça para a esquerda e continue andando em linha reta enquanto olha para a esquerda. Continue alternando o olhar para direita e esquerda a cada 3 passos até que complete duas repetições em cada direção.

**Pontuação:** Marcar a maior categoria que alcançar.

( ) Normal (3 pontos) - Realiza rotações da cabeça suavemente sem mudanças na marcha. Desvios não maiores que 15 cm para fora da largura da pista de 30 cm.

( ) Deficiência leve (2 pontos) - Realiza rotação da cabeça suavemente com leve mudança na velocidade da marcha (*i.e*., pequena interrupção no trajeto da marcha), desvios de 15 – 25 cm para fora da largura da pista de 30 cm ou uso de dispositivo de auxílio.

( ) Deficiência moderada (1 ponto) - Realiza rotação da cabeça com mudança moderada na velocidade da marcha, diminui velocidade, desvia 25 – 38 cm para fora da largura da pista de 30 cm, mas recupera e pode continuar a andar.

( ) Deficiência grave (0 ponto) - Realiza a tarefa com interrupção grave da marcha (*i.e.*, tropeça para fora da largura da pista de 30 cm, perde o equilíbrio, para ou toca a parede).

****Em casos de necessidade, demonstrar como realizar a tarefa.***

**4. Marcha com movimento vertical da cabeça para cima e para baixo**

**Instruções:** Ande daqui até a marca de 6 m. Comece a andar no seu ritmo normal. Continue andando em linha reta, após 3 passos, vire a cabeça para cima e continue andando em linha reta enquanto olha para cima. Após mais 3 passos, vire a cabeça para baixo e continue andando em linha reta enquanto olha para baixo. Continue alternando o olhar para cima e para baixo a cada 3 passos até completar duas repetições em cada direção.

**Pontuação:** Marcar a maior categoria que alcançar.

( ) Normal (3 pontos) - Realiza movimentos da cabeça sem nenhuma mudança na marcha. Desvia não mais que 15 cm para fora da largura da pista de 30 cm.

( ) Deficiência leve (2 pontos) - Realiza a tarefa com leve mudança na velocidade da marcha (*i.e.*, pequena interrupção no trajeto da marcha), devia 15 – 25 cm para fora da largura da pista de 30 cm ou usa algum dispositivo de auxílio.

( ) Deficiência moderada (1 ponto) - Realiza a tarefa com mudança moderada na velocidade da marcha, diminui velocidade, desvia 25 –38 cm para fora da largura da pista de 30 cm, mas recupera e pode continuar a andar.

( ) Deficiência grave (0 ponto) - Realiza a tarefa com interrupção grave da marcha, tropeça 38 cm para fora da largura da pista de 30 cm, perde o equilíbrio, para ou toca a parede.

****Em casos de necessidade, demonstrar como realizar a tarefa.***

**5. Marchar e girar**

**Instruções:** Comece a andar no seu ritmo normal. Eu falo para você, “vire e pare”, vire o mais rápido que puder e olhe para a direção oposta e pare.

**Pontuação:** Marcar a maior categoria que alcançar.

( ) Normal (3 pontos) - Vira de forma segura em 3 segundos e para rapidamente sem perda de equilíbrio.

( ) Deficiência leve (2 pontos) - Vira de forma segura em 3 segundos e para sem perda de equilíbrio ou vira de forma segura em 3 segundos e para com desequilíbrio leve, requerendo pequenos passos para recuperar o equilíbrio.

( ) Deficiência moderada (1 ponto) - Vira lentamente, requer assistência verbal ou pequenos passos para recuperar o equilíbrio após virar e parar.

( ) Deficiência grave (0 ponto) - Não consegue virar com segurança, requer assistência para virar e parar.

**6. Passo sobre obstáculo**

**Instruções:** Comece a andar na sua velocidade normal. Quando vier em direção a caixa de sapato, dê um passo sobre ela, não em volta da caixa, e continue andando.

**Pontuação:** Marcar a maior categoria que alcançar.

( ) Normal (3 pontos) - É capaz de passar por cima de duas caixas de sapatos empilhadas (22 cm de altura) sem mudança na velocidade da marcha; sem evidência de desequilíbrio.

( ) Deficiência leve (2 pontos) - É capaz de passar por cima de uma caixa de sapato (11 cm de altura) sem mudança na velocidade da marcha, sem evidência de desequilíbrio.

( ) Deficiência moderada (1 ponto) - É capaz de passar por cima de uma caixa de sapato (11 cm de altura), mas mais devagar e ajusta os passos para maior segurança. Pode requerer assistência verbal.

( ) Deficiência grave (0 ponto) - Não consegue realizar sem assistência.

**7. Marcha com base de suporte estreita**

**Instruções:** Andar com os braços cruzados sobre o tórax, pés alinhados um atrás do outro, como em marcha tandem, por uma distância de 3,6 m. O número de passos dados em uma linha reta é contado com o máximo de 10 passos.

**Pontuação:** Marcar a maior categoria que alcançar.

( ) Normal (3 pontos) - É capaz de andar 10 passos sem cambalear.

( ) Deficiência leve (2 pontos) - Anda 7–9 passos.

( ) Deficiência moderada (1 ponto) - Anda 4–7 passos.

( ) Deficiência grave (0 ponto) - Anda menos que 4 passos ou não consegue realizar sem assistência.

**8. Marcha com os olhos fechados**

**Instruções:** Andar na sua velocidade normal daqui até a próxima marca (6 m) com os olhos fechados.

**Pontuação:** Marcar a maior categoria que alcançar.

( ) Normal (3 pontos) - Anda 6 m sem dispositivos de auxílio, boa velocidade, sem evidência de desequilíbrio, padrão de marcha normal, não desvia mais que 15 cm para fora da largura da pista de 30 cm. Anda 6 m em menos de 7 segundos.

( ) Deficiência leve (2 pontos) - Anda 6 m, usa dispositivos de auxílio, menor velocidade, desvios leves na marcha, desvia 15 cm para fora da largura da pista de 30 cm. Anda 6 m entre 7 a 9 segundos.

( ) Deficiência moderada (1 ponto) - Anda 6 m, menor velocidade, padrão anormal de marcha, evidência de desequilíbrio, desvia 25 – 38 cm para fora da largura da pista de 30 cm. Requer mais que 9 segundos para andar 6 m.

( ) Deficiência grave (0 ponto) - Não consegue andar 6 m sem assistência, desvios ou desequilíbrios graves na marcha maiores que 38 cm para fora da largura da pista de 30 cm ou não realizar a tarefa.

**9. Andar para trás**

**Instruções:** Andar para trás até eu pedir para parar.

**Pontuação:** Marcar a maior categoria que alcançar.

( ) Normal (3 pontos) - Anda 6 m, sem dispositivo de auxílio, sem evidência de desequilíbrio, padrão de marcha normal, sem desvios maiores que 15 cm para fora da largura da pista de 30 cm.

( ) Deficiência leve (2 pontos) - Anda 6 m, usa dispositivo de auxílio, menor velocidade, desvios médios na marcha, desvio de 15 – 25 cm para fora da largura da pista de 30 cm.

( ) Deficiência moderada (1 ponto) - Anda 6 m, menor velocidade, padrão anormal de marcha, evidência de desequilíbrio, desvia 25 – 38 cm para fora da largura da pista de 30 cm.

( ) Deficiência grave (0 ponto) - Não consegue andar 6 m sem assistência, desvios ou desequilíbrios graves na marcha, desvia mais que 38 cm para fora da largura da pista de 30 cm ou não realizara a tarefa.

**10. Passos**

**Instruções:** Suba as escadas como subiria em sua casa (*i.e.*, usando o corrimão, se necessário). No final, vire e desça as escadas.

**Pontuação:** Marcar a maior categoria que alcançar.

( ) Normal (3 pontos) - Alternando os pés, sem corrimão.

( ) Deficiência leve (2 pontos) - Alternando os pés, tem que usar o corrimão.

( ) Deficiência moderada (1 ponto) - Dois pés em um degrau, tem que usar o corrimão.

( ) Deficiência grave (0 ponto) - Não consegue realizar de forma segura.

**Pontuação total: ___________**

**Pontuação máxima 30 pontos.**
